# Supplementary figures and images for: Signaling thresholds govern heterogeneity in IL-7-receptor-mediated responses of naïve CD8+ T cells
Source: PubMed Central journal article supplement — Immunol Cell Biol. 2011 Feb 22;89(5):581–94. doi: 10.1038/icb.2011.5 (PMC3342499; doi:10.1038/icb.2011.5), 2011-02-22

# Supplementary Figure 1

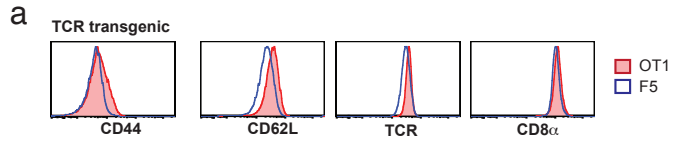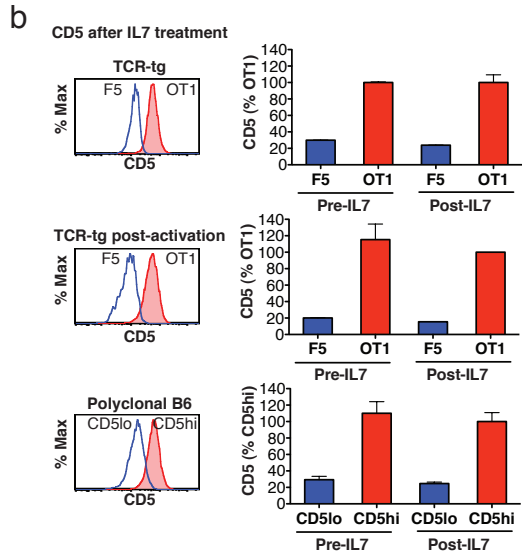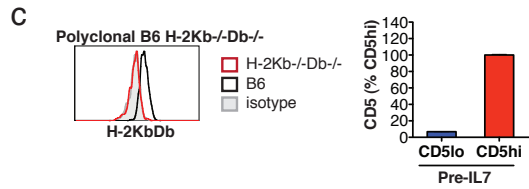

# Supplementary Figure 2

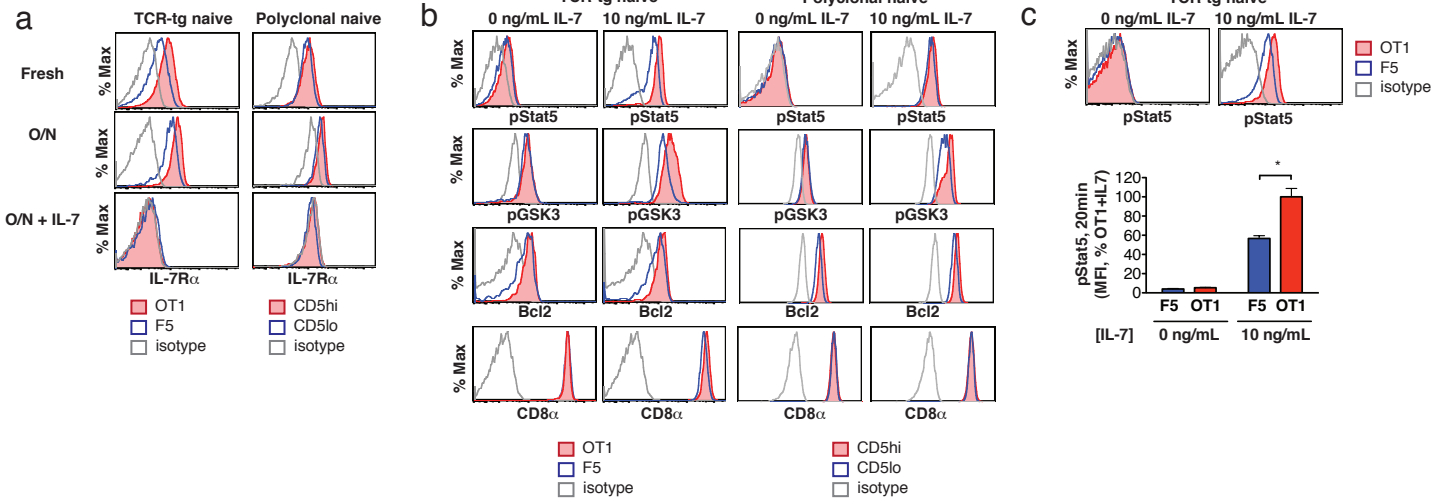

# Supplementary Figure 3

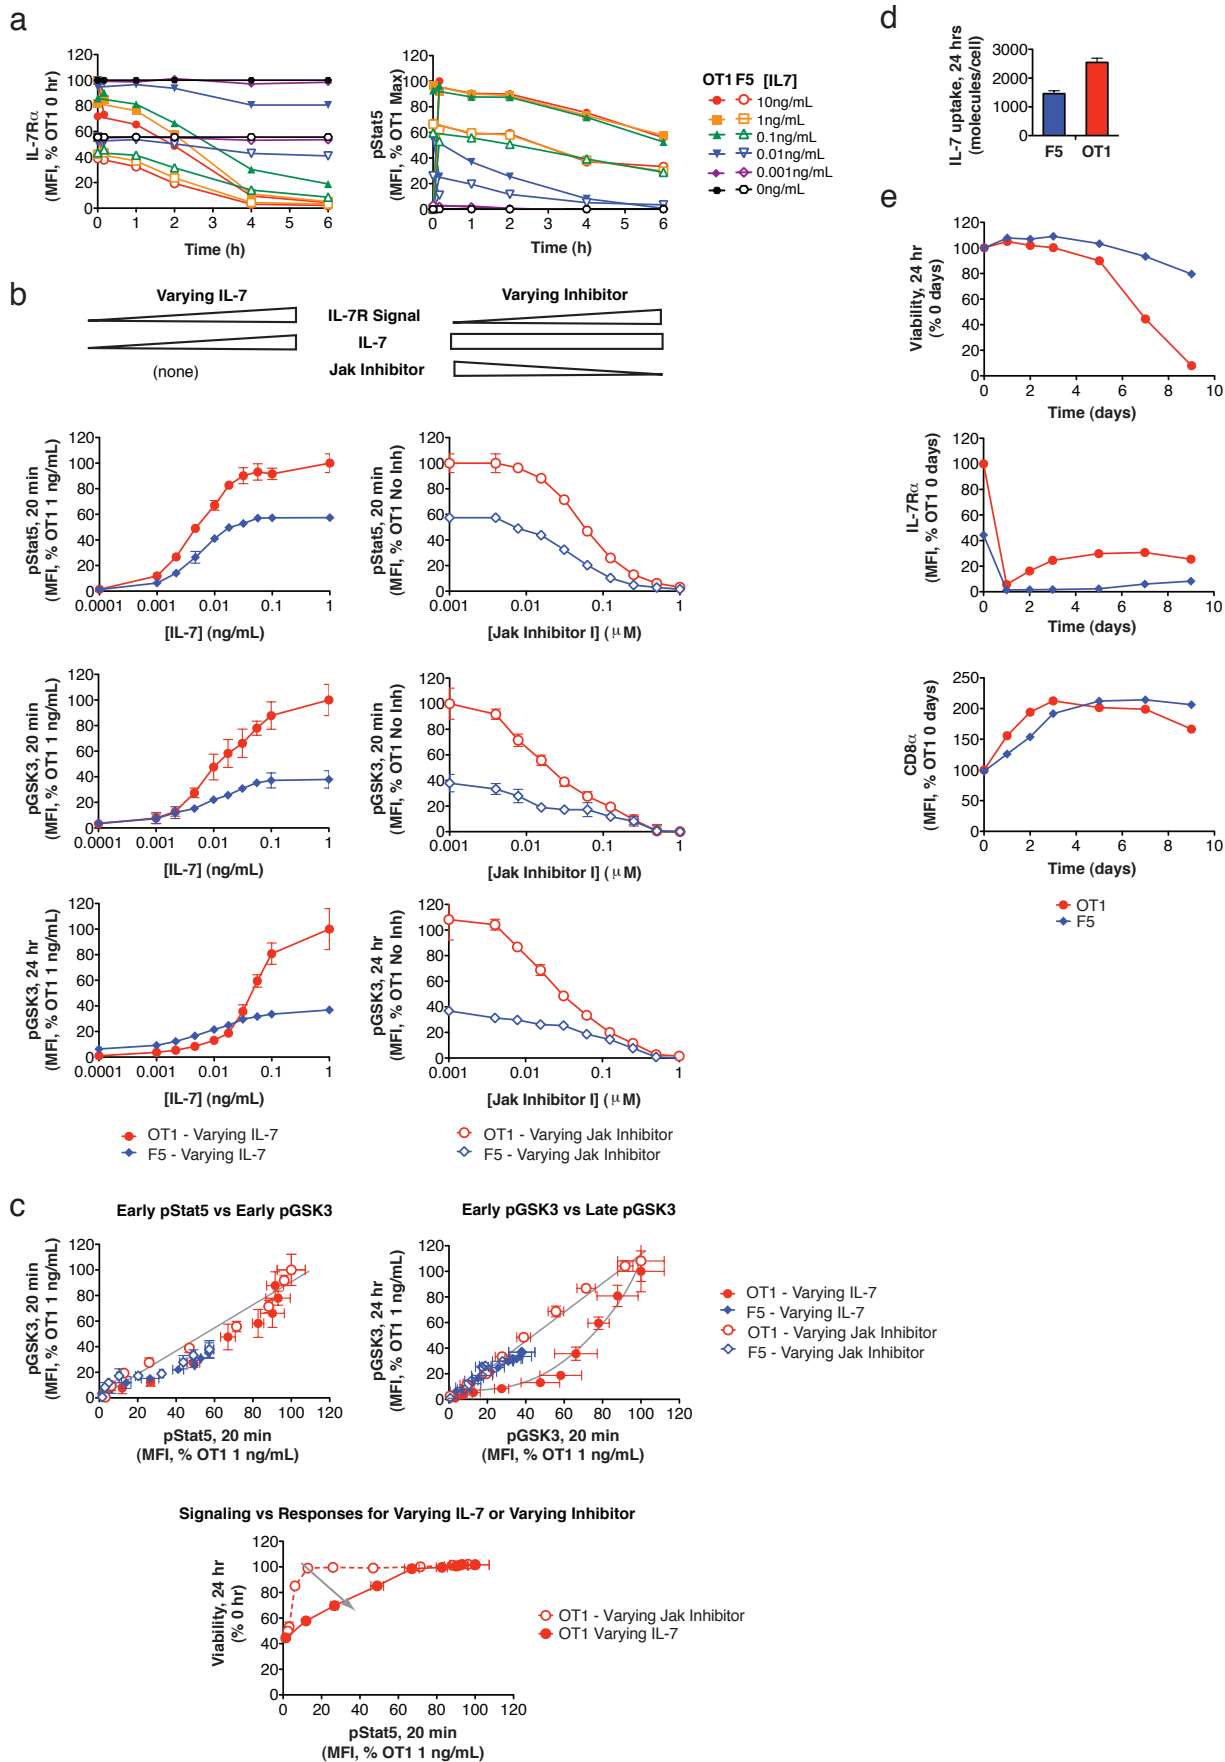

# Supplementary Figure 4

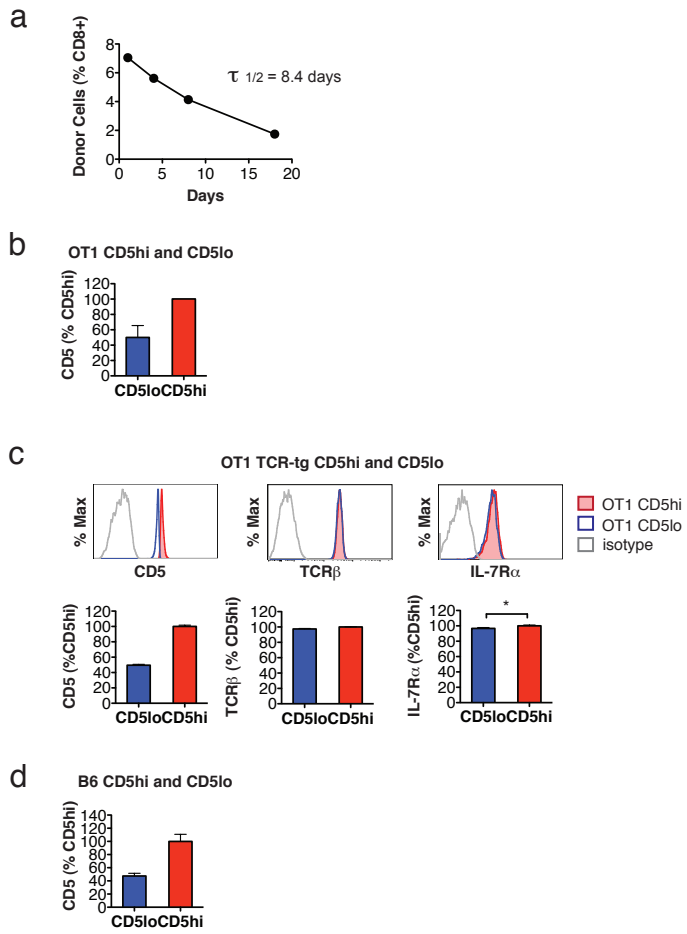

Supplement: icb20115x1.pdf [file icb20115x1.pdf]
